# Supplementary material for: Cascaded utilization of magnetite nanoparticles@onion-like carbons from wastewater purification to supercapacitive energy storage
Source: Royal Society of Chemistry journal article supplement (doi:10.1039/d4dt02559h), 2024-01-01
Supplement: d4dt02559h1.pdf [file d4dt02559h1.pdf]

Electronic supplementary information for:

**Cascaded Utilization of Magnetite Nanoparticles@Onion-Like Carbons from Wastewater Purification to Supercapacitive Energy Storage**

**Authors**

*Xin Jiao,<sup>a,b,c,d,e</sup> Min Xiao,<sup>a,b,c,d</sup> Fengshi Cai,<sup>a,b,c,d</sup> Yingchun Fan,<sup>a,b,c,d</sup> Shuaipeng Meng,<sup>a,b,c,d</sup>  
Xiude Guan,<sup>e</sup> Huiquan Wang,<sup>a,b,c,d</sup> Chenguang Zhang<sup>a,b,c,d,\*</sup>*

**Affiliations**

<sup>a</sup> School of Materials Science and Engineering, Tianjin University of Technology, Tianjin 300384, PR China.

<sup>b</sup> Institute for Green Nanotechnology, Tianjin University of Technology, Tianjin 300384, PR China.

<sup>c</sup> Tianjin Key Laboratory for Photoelectric Materials & Devices, Tianjin University of Technology, Tianjin 300384, PR China.

<sup>d</sup> Key Laboratory of Display Materials and Photoelectric Devices, Tianjin University of Technology, Ministry of Education, Tianjin 300384, PR China.

<sup>e</sup> College of Materials Engineering, Shanxi College of Technology, Shuozhou, Shanxi Province 036000, PR China.

**Corresponding author:**

Email: cgzhang@tjut.edu.cn (Chenguang Zhang).

## Supplementary figures

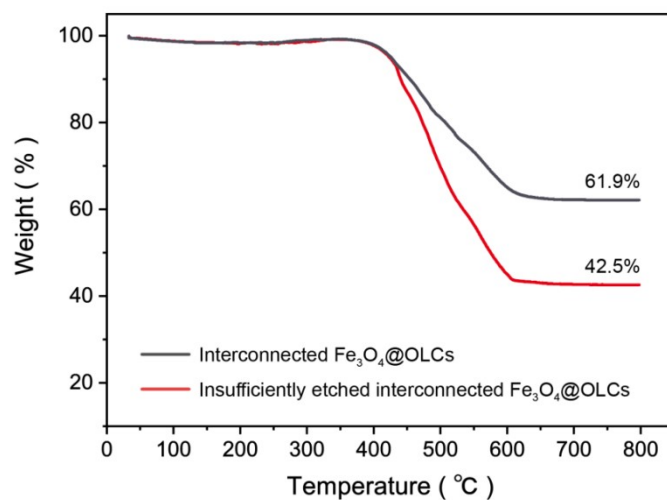

**Fig. S1.** TG curves of interconnected Fe<sub>3</sub>O<sub>4</sub>@OLCs and insufficiently etched interconnected Fe<sub>3</sub>O<sub>4</sub>@OLCs at a heating rate of 10 °C min<sup>-1</sup> from 30 to 800 °C in air.

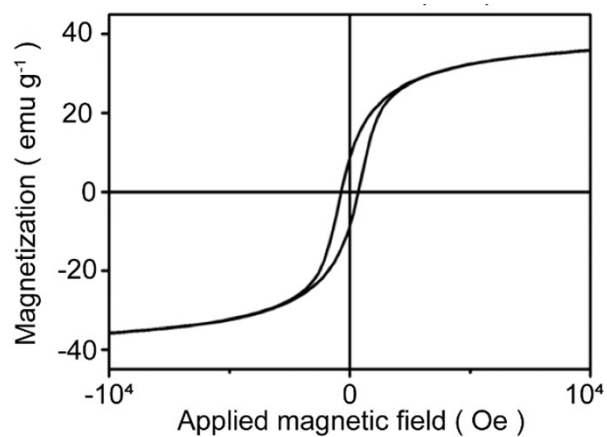

**Fig. S2.** Magnetic hysteresis loop of insufficiently etched interconnected Fe<sub>3</sub>O<sub>4</sub>@OLCs.

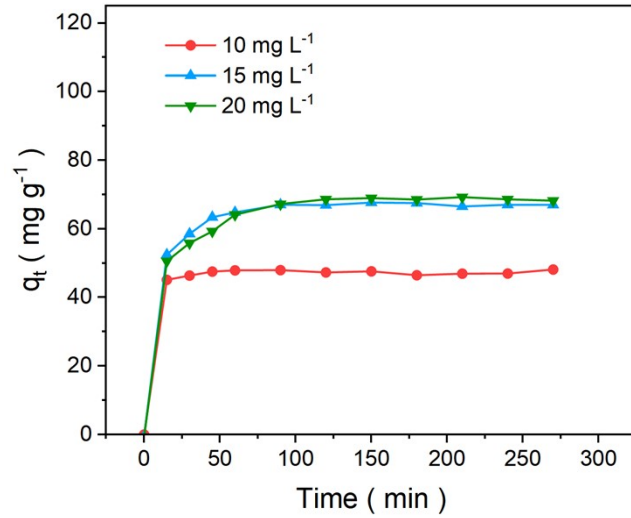

**Fig. S3.** Variation of the adsorption capacities of interconnected  $\text{Fe}_3\text{O}_4@\text{OLCs}$  with treated period.

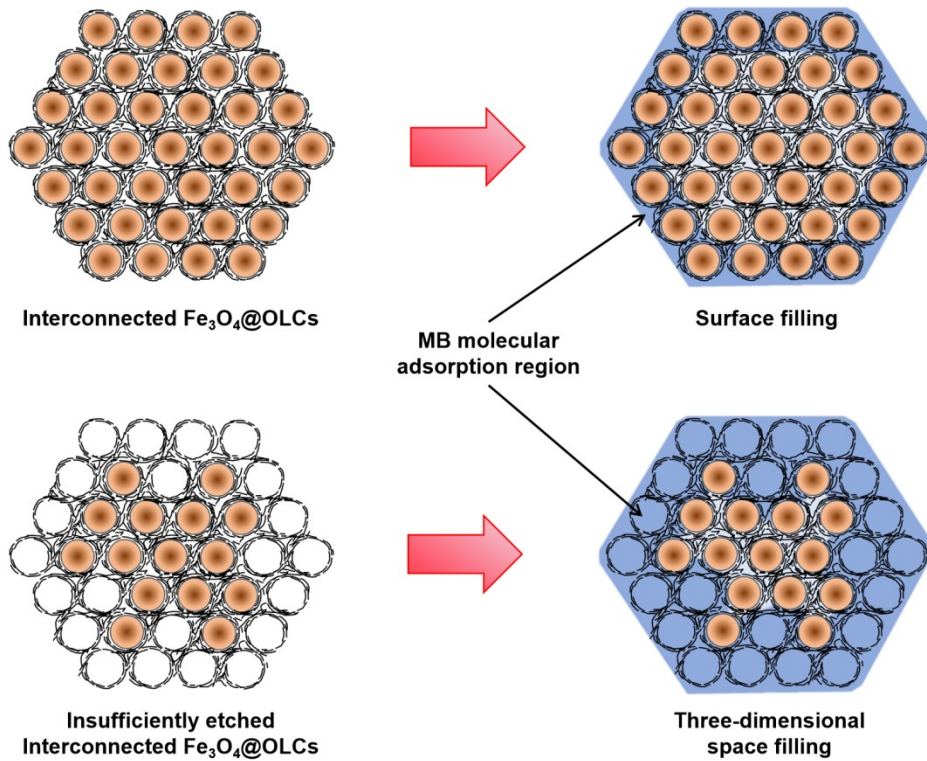

**Fig. S4.** Schematic illustration of the difference in MB adsorption mechanisms between interconnected  $\text{Fe}_3\text{O}_4@\text{OLCs}$  and insufficiently etched interconnected  $\text{Fe}_3\text{O}_4@\text{OLCs}$ .

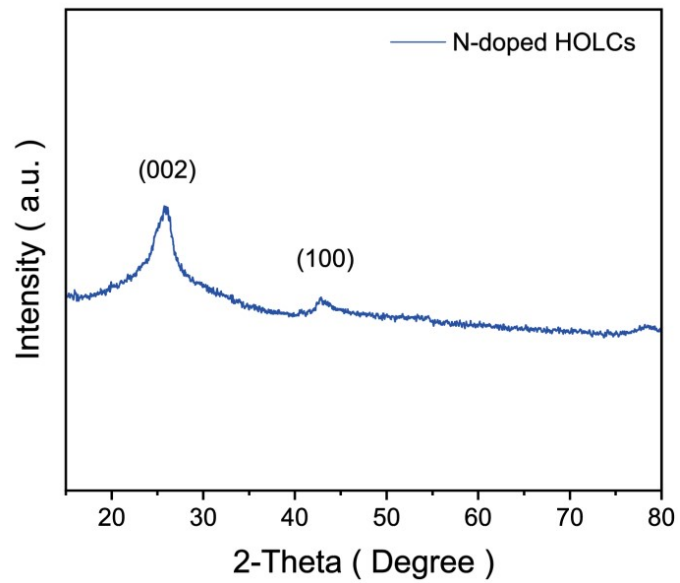

**Fig. S5.** XRD profile of the N-doped HOLCs.

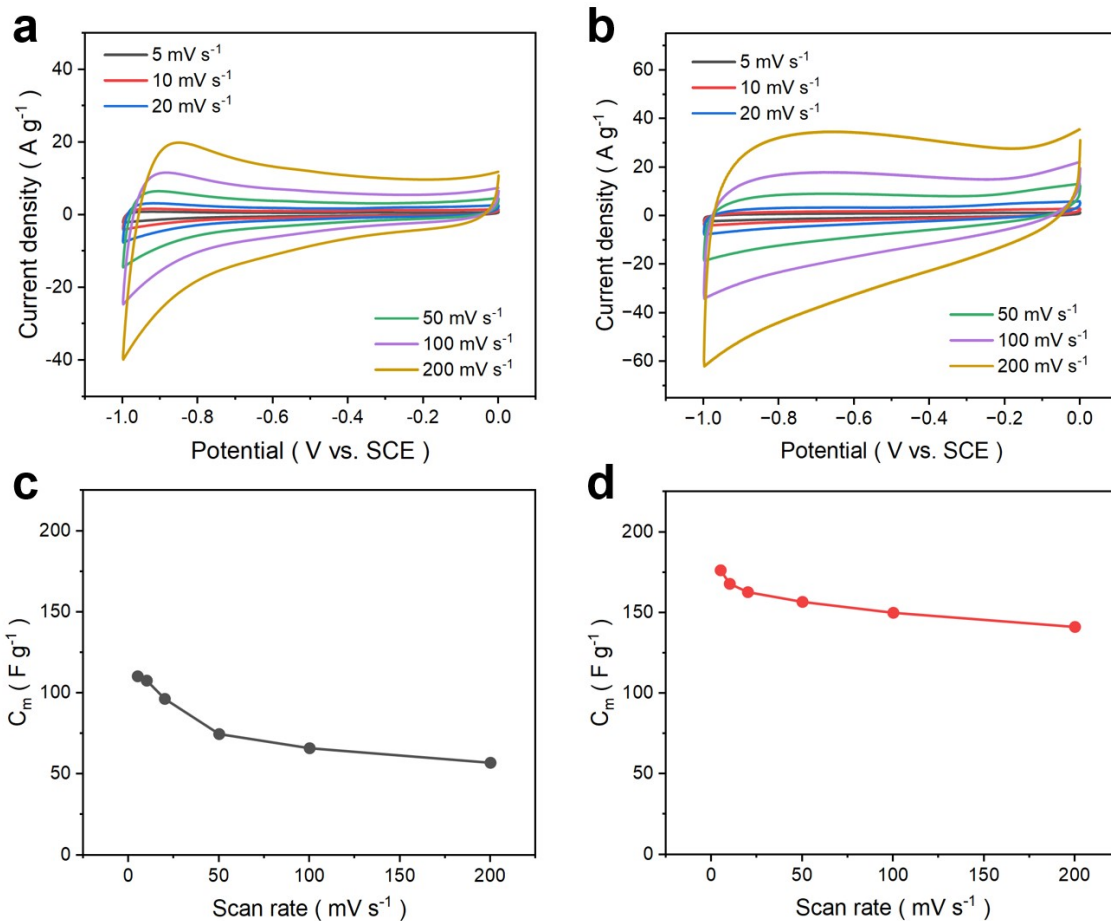

**Fig. S6.** CV curves of (a) insufficiently etched interconnected Fe<sub>3</sub>O<sub>4</sub>@OLCs and (b) N-doped porous carbon structure at different scan rates from 5 to 200 mV s<sup>-1</sup> in three-electrode testing system. Specific gravimetric capacitances (C<sub>m</sub>) calculation results of (c) Fe<sub>3</sub>O<sub>4</sub>@OLCs and (d) N-doped HOLCs at different scan rates from 5 to 200 mV s<sup>-1</sup>.

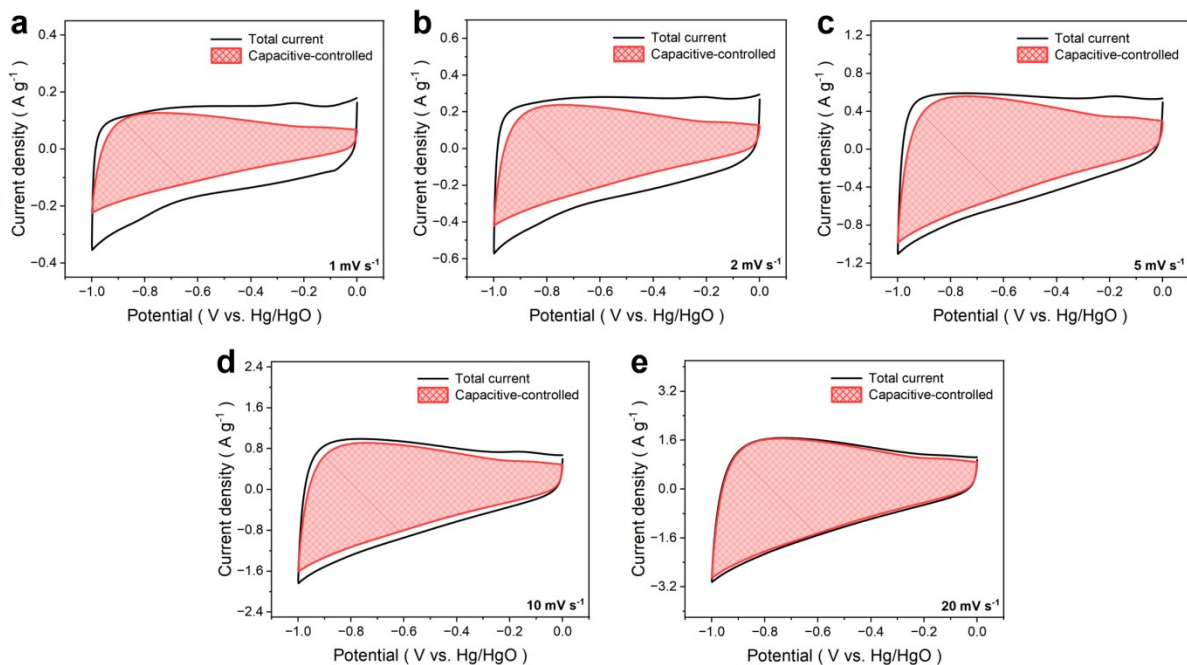

**Fig. S7.** Electrochemical kinetic analysis of N-doped HOLCs. Percentage of capacitive-controlled charge contribution from EDLC based on CV measurements at scan rates of (a) 1, (b) 2, (c) 5, (d) 10 and (e) 20  $\text{mV s}^{-1}$ .

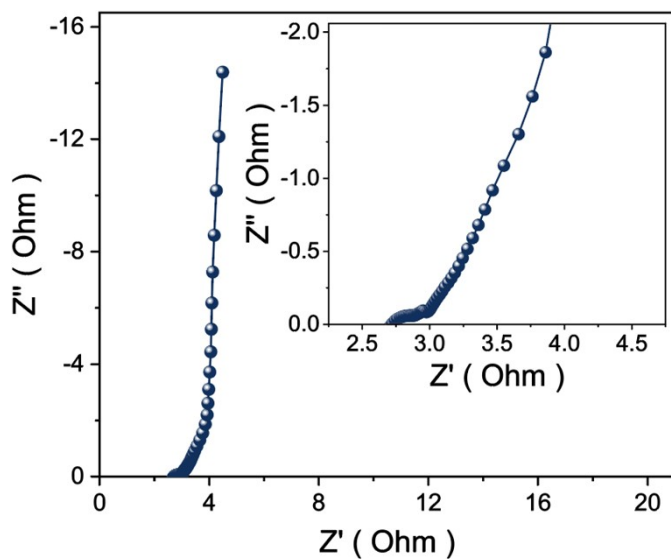

**Fig. S8.** Nyquist plot of supercapacitor.

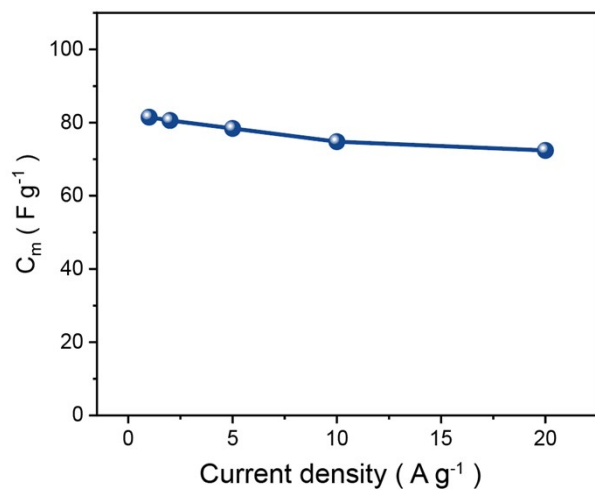

**Fig. S9.** Specific gravimetric capacitances ( $C_m$ ) versus current densities of the supercapacitor device.

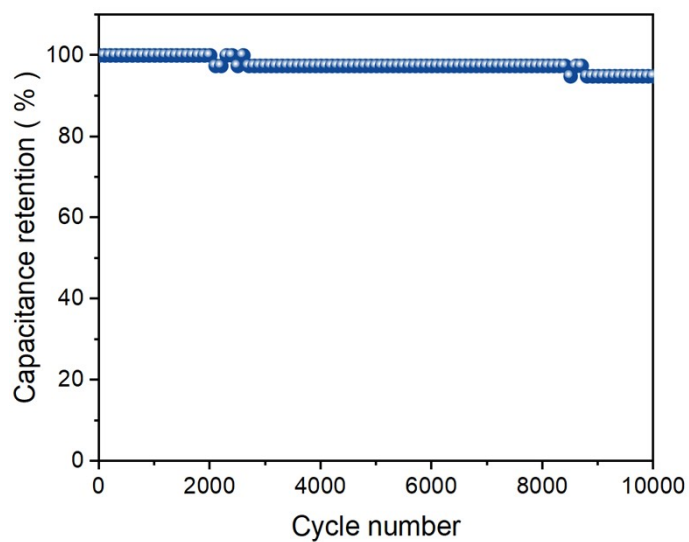

**Fig. S10.** Cycling stability of supercapacitor measured at a charging-discharging current density of  $10 A g^{-1}$ .

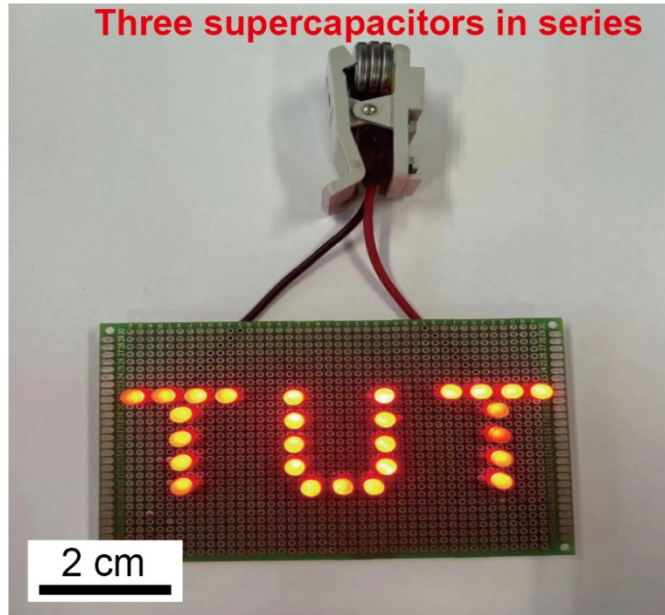

**Fig. S11.** 27 red LEDs powered by three supercapacitors connected in series.



**Table S1.** Comparisons of energy storage performances of supercapacitor based on N-doped HOLCs with other carbon-based supercapacitors.

| Materials                           | Electrolyte                         | Energy density (Wh kg <sup>-1</sup> ) | Power density (kW kg <sup>-1</sup> ) | Cycle stability         | Ref.      |
|-------------------------------------|-------------------------------------|---------------------------------------|--------------------------------------|-------------------------|-----------|
| Sulfur-doped carbon nano-onions     | 1M Na <sub>2</sub> SO <sub>4</sub>  | 10.6                                  | 0.1                                  | 95% after 10000 cycle   | S1        |
| Quinone-decorated onion-like carbon | 1M H <sub>2</sub> SO <sub>4</sub>   | 6.4                                   | 19.2                                 | 90% after 10000 cycle   | S2        |
| Nori:ZnCl <sub>2</sub> -2:1         | 6M KOH                              | 6.1                                   | 0.05                                 | 96% after 5000 cycle    | S3        |
| ZIF-8 derived carbon                | 6M KOH                              | 4.66                                  | 0.21                                 | 96% after 10000 cycle   | S4        |
| HPCF                                | 6M KOH                              | 9.1                                   | 3.5                                  | 95% after 10000 cycle   | S5        |
| PANI-carbon nanotube composites     | H <sub>2</sub> SO <sub>4</sub> /PVA | 5.8                                   | 1.1                                  | 83.2% after 2000 cycle  | S6        |
| TPI-P-700                           | 1M H <sub>2</sub> SO <sub>4</sub>   | 10.5                                  | 0.5                                  | 100% after 10000 cycle  | S7        |
| Phosphorus-doped porous carbon      | 1M H <sub>2</sub> SO <sub>4</sub>   | 10.6                                  | 0.22                                 | 98.3% after 5000 cycle  | S8        |
| HPCSLs-700                          | 7M KOH                              | 8.6                                   | 0.014                                | 92% after 10000 cycle   | S9        |
| N-C-HPCS                            | 6M KOH                              | 6.1                                   | 0.25                                 | 108% after 10000 cycle  | S10       |
| N-doped HOLCs                       | 3M KOH                              | 11.3<br>7.9                           | 0.51<br>8.9                          | 94.6% after 10000 cycle | This Work |

**Reference:**

S1. G. Dhakal, D. Mohapatra, T.L. Tamang, M. Lee, Y.R. Lee, J.-J. Shim, *Energy*, 2021, **218**, 119436.

S2. M. Bhaumik, K. Raju, I. Arunachellan, T. Ludwig, M.K. Mathe, A. Maity, S. Mathur, *Electrochim. Acta*, 2020, **342**, 136111.

- S3. B. Li, F. Dai, Q. Xiao, L. Yang, J. Shen, C. Zhang, M. Cai, *Energy Environ. Sci.*, 2016, **9**, 102-106.
- S4. H. N. Abdelhamid, S. A. Al Kiey, W. Sharmoukh, *Appl. Organomet. Chem.*, 2021, **36**, 1.
- S5. Y. Zhang, R. Shao, W. Xu, J. Ding, Y. Wang, X. Yan, W. Shi, M. Wang, *Chem. Eng. J.*, 2021, **419**, 129576.
- S6. Y. Wang, S. Tang, S. Vongehr, J. A. Syed, X. Wang, X. Meng, *Scientific Reports* 2016, **6**, 12883.
- S7. D. Yan, Y. Wu, R. Kitaura, K. Awaga, *J. Mater. Chem. A*, 2019, **7**, 26829-26837.
- S8. G. Lin, Q. Wang, X. Yang, Z. Cai, Y. Xiong, B. Huang, *RSC Adv.* 2020, **10**, 17768.
- S9. J. Pang, W. Zhang, J. Zhang, G. Cao, M. Han, Y. Yang, *Green Chem.*, 2017, **19**, 3916-3926.
- S10. S. Park, B. Seo, D. Shin, K. Kim, W. Choi, *Chem. Eng. J.*, 2022, **433**, 134486.
